# Supplementary figures and images for: Maxillary sinus floor augmentation comparing bovine versus porcine bone xenografts mixed with autogenous bone graft. A split‐mouth randomized controlled trial
Source: PubMed Central journal article supplement — Clin Oral Implants Res. 2022 Mar 3;33(5):524–36. doi: 10.1111/clr.13912 (PMC9313845; doi:10.1111/clr.13912), 2022-03-03

# mRNA relative expression

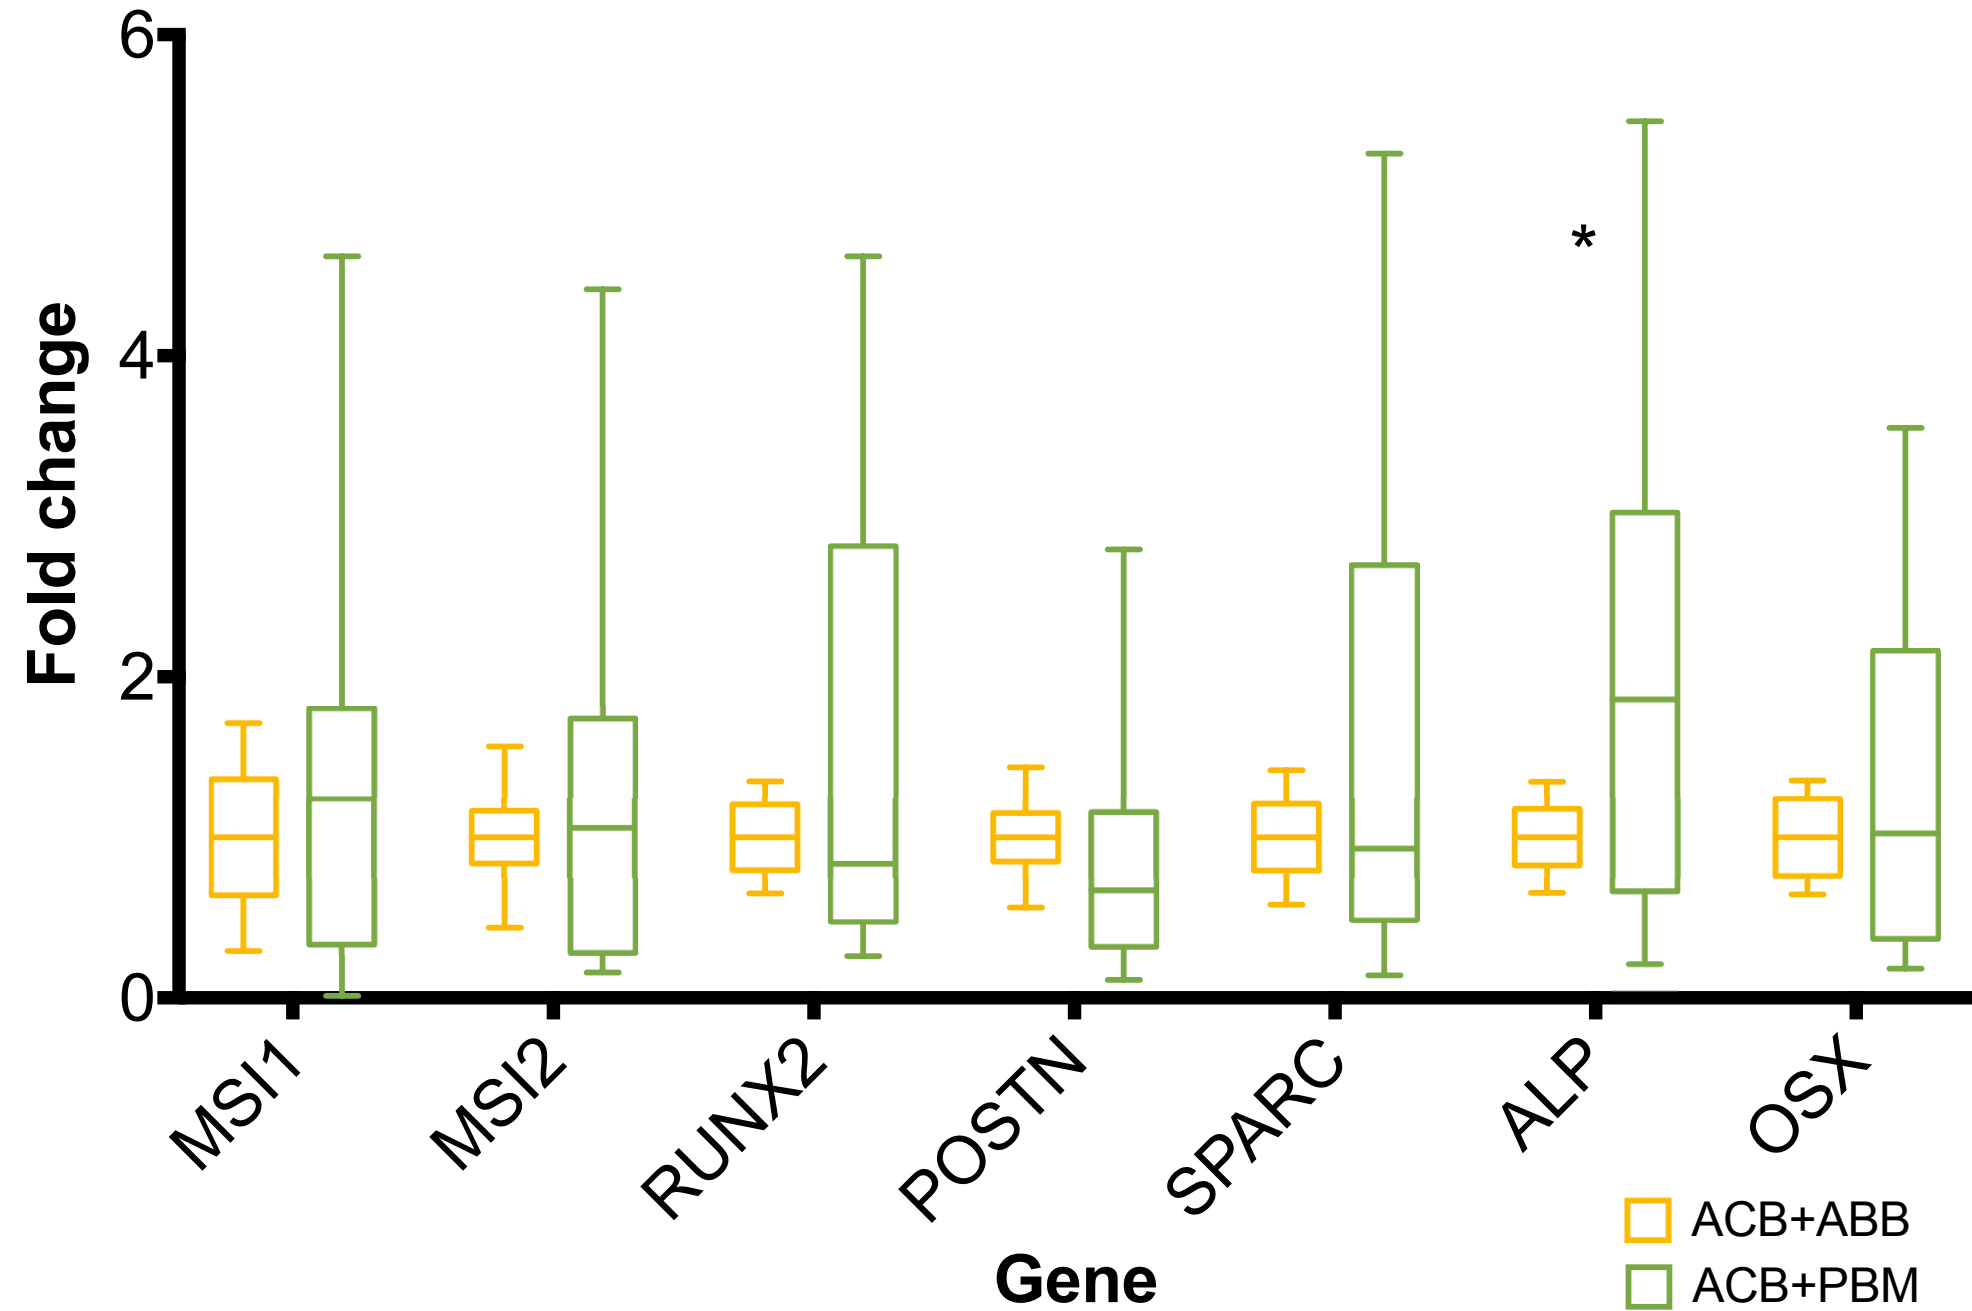

Supplement: CLR-33-524-s002.pdf [file CLR-33-524-s002.pdf]
